# Supplementary material for: Effects of melting ice sheets and orbital forcing on the early Holocene warming in the extratropical Northern Hemisphere
Source: Copernicus journal article supplement (doi:10.5194/cp-12-1119-2016), 2016-05-04
Supplement: Supplementary file 1 [file cp-12-1119-2016-supplement.pdf]

Supplement of *Clim. Past*, 12, 1119–1135, 2016  
<http://www.clim-past.net/12/1119/2016/>  
doi:10.5194/cp-12-1119-2016-supplement  
© Author(s) 2016. CC Attribution 3.0 License.

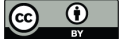

Climate  
of the Past

Open Access

The EGU logo features the letters 'EGU' in a bold, sans-serif font, with a circular arrow graphic behind the 'G'.

*Supplement of*

## **Effects of melting ice sheets and orbital forcing on the early Holocene warming in the extratropical Northern Hemisphere**

**Yurui Zhang et al.**

*Correspondence to:* Yurui Zhang ([yurui.zhang@helsinki.fi](mailto:yurui.zhang@helsinki.fi))

The copyright of individual parts of the supplement might differ from the CC-BY 3.0 licence.

# 11.5–0 kyr insolation anomaly

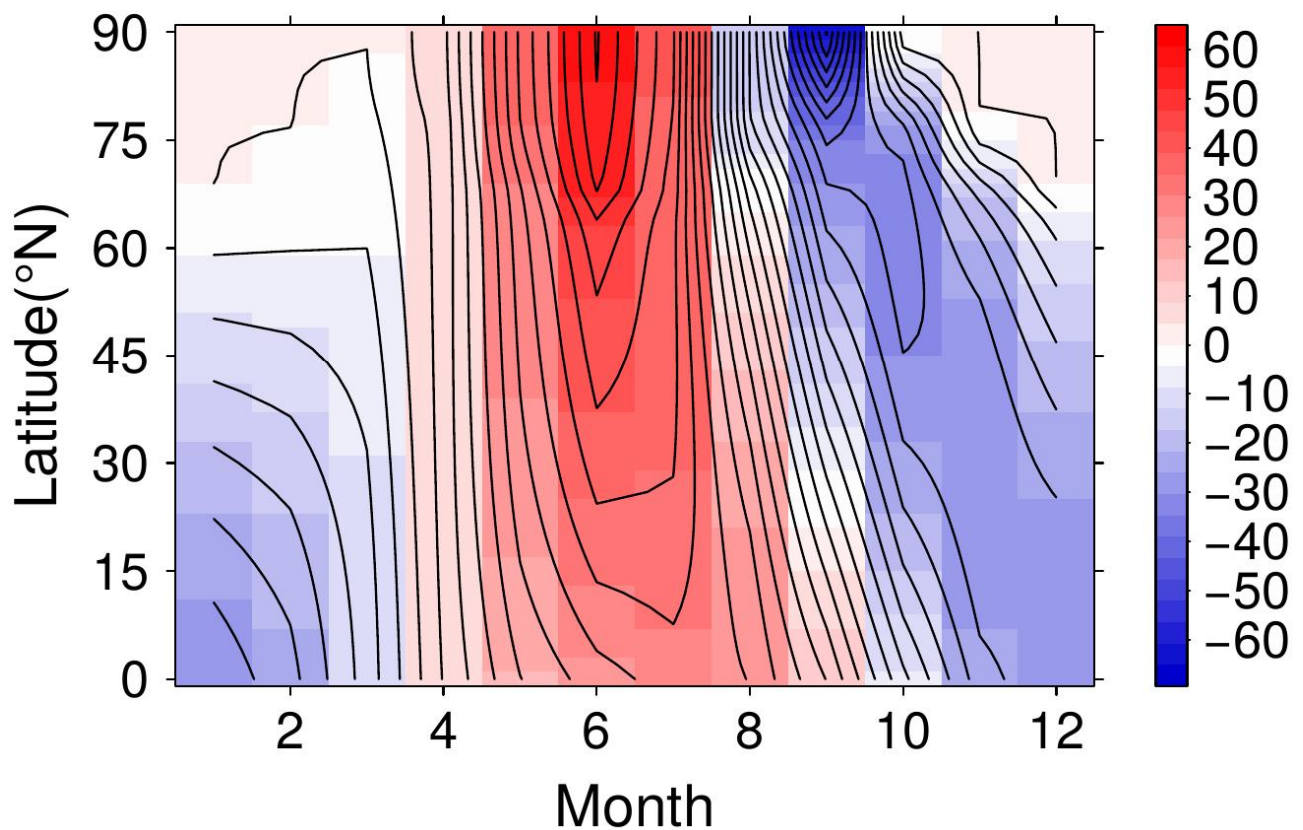

Fig. S11. Monthly insolation anomaly ( $\text{W m}^{-2}$ ) at 11.5 kyr compared to 0kyr derived from Berger 1978

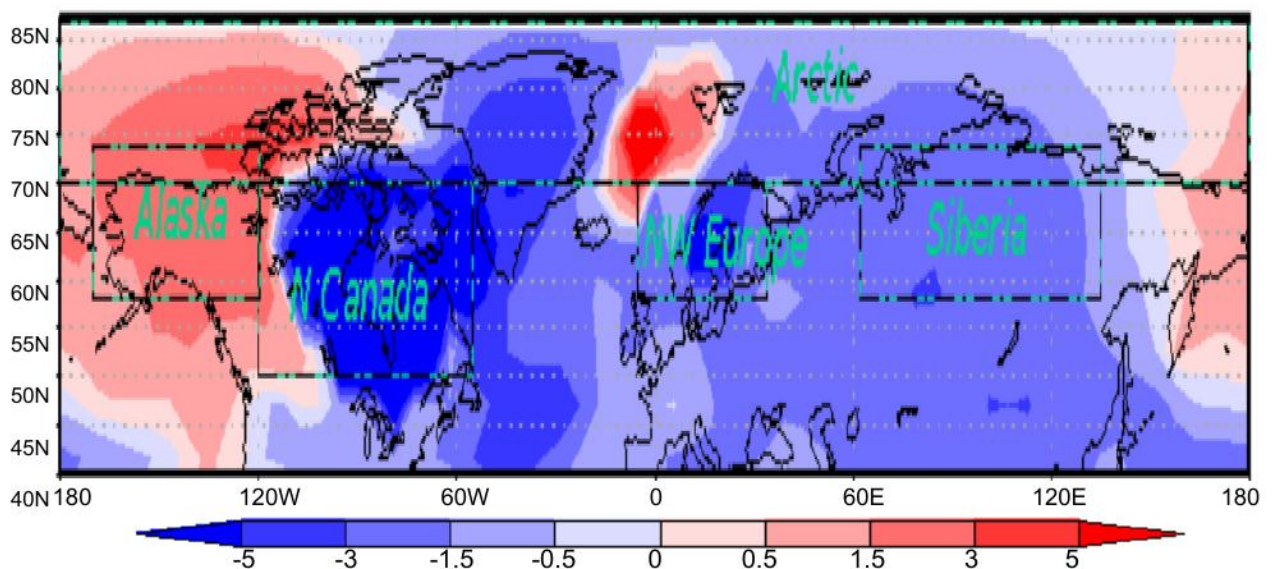

Fig. S12. Selected region denoted by the box over where the temperature evolution is shown. Shown in the background is the simulated annual mean temperature at the onset of the Holocene.

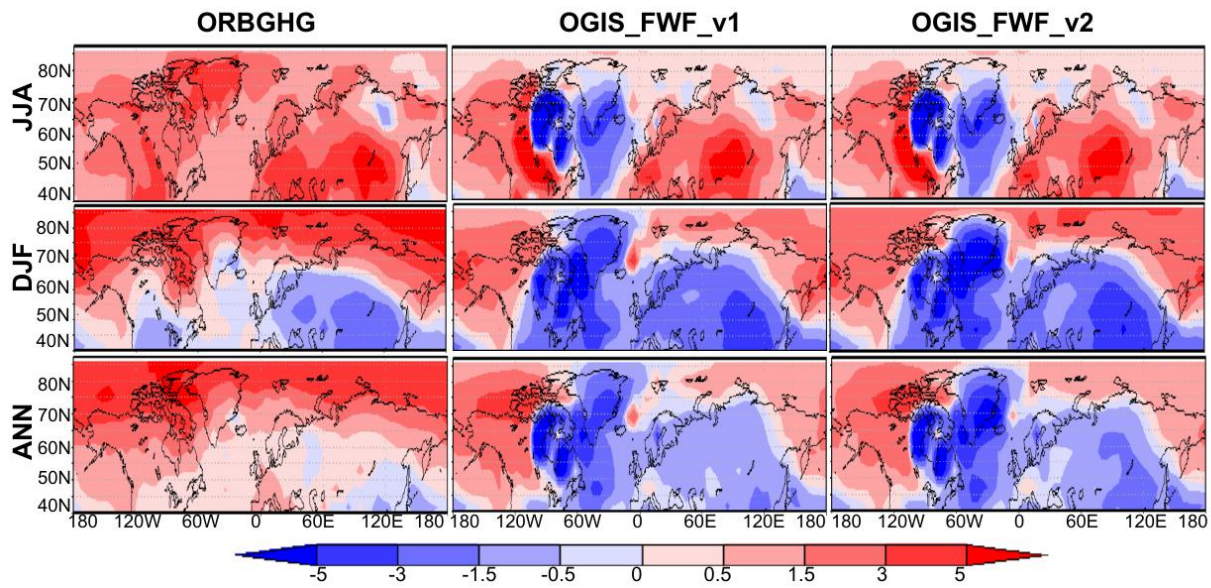

Fig. SI3. Simulated temperatures for 10 kyr (shown as the deviation of 100-yr average from PI). Left, middle and right columns show the simulations ORBGHG, OGIS\_FWF-v1 and OGIS\_FWF-v2, respectively. Upper, middle and lower panel indicate summer, winter and annual temperatures, respectively

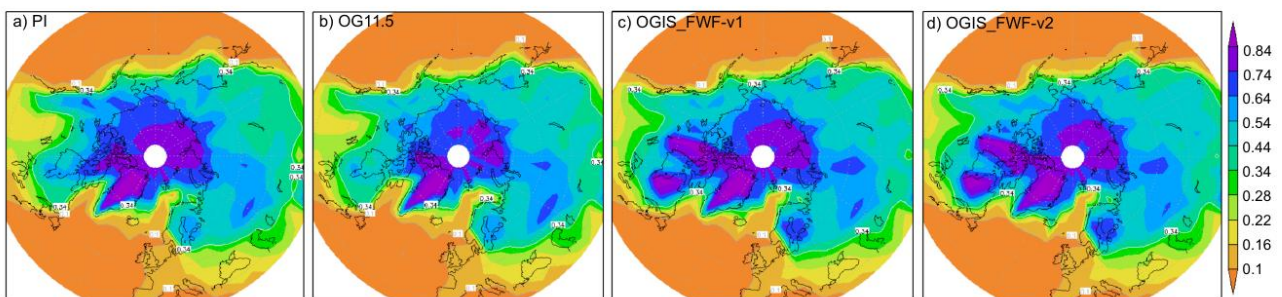

Fig. SI4. Simulated winter surface albedo shown as a 100-yr average in the extratropical Northern Hemisphere. (a) is for the PI, while (b), (c) and (d) represent the simulations ORBGHG, OGIS\_FWF-v1 and OGIS\_FWF-v2 at 10 kyr, respectively.
